**Specification of muscle neurotransmitter sensitivity by a Paired-like homeodomain protein in *Caenorhabditis elegans***

Robyn Branicky and Seigfried Hekimi *Development* **132**, 4999-5009.

There is an error in the ePress version of this article published on 19 October 2005.

On p. 5002, the sub-heading '*dsc-1* encodes a Q50 Paired-like (or Prd-like) homeodomain protein' should have been the first line of the paragraph that follows it, not a sub-heading.

This error has been corrected in both the published online and print versions.

We apologise to the authors and readers for this mistake.
